# Supplementary material
Source: PubMed Central journal article supplement (PMC4756602)
Supplement: DS_10.1177_0706743715620411_an.pdf [file DS_10.1177_0706743715620411_an.pdf]

**Annex1:**

Search term for the systematic literature search as used in Embase and PsycINFO  
(in CENTRAL with minor adoptions due to search entry requirements):

#1 (depress\*) OR (dysthymi\* ) OR (Depressive AND Disorder\*) OR (Depression) OR ("Depression AND Postpartum") OR ("Depressive AND Disorder AND Major") OR ("Bipolar AND Disorder\*") OR ("Adjustment AND Disorder\*") OR ("Dysthymic AND Disorder\*") OR ("Seasonal AND Affective AND Disorder\*") OR ("Affective AND Disorder\* AND Psychotic") OR ("Mood AND Disorder\*") OR ("Affective AND Symptoms") OR ("Affective AND Disorder\*") OR ("Depressive AND Disorder\* AND treatment-resistant")

AND

#2 ("Antidepressive AND Agents") OR (agomelatin\* OR amineptin\* OR amitriptylin\* OR amoxapin\* OR bupropion OR chlorimipramin\* OR citalopram OR clomipramin\* OR desipramin\* OR dibenzepin\* OR dosulepin\* OR dothiepin\* OR doxepin\* OR duloxetine\* OR escitalopram\* OR fluoxetine\* OR fluvoxamin\* OR imipramin\* OR isocarboxazid\* OR lofepramin\* OR maprotilin\* OR mianserin\* OR milnacipran\* OR mirtazapin\* OR moclobemid\* OR nefazodon\* OR nortriptylin\* OR paroxetine\* OR phenelzin\* OR protriptylin\* OR reboxetin\* OR sertraline\* OR setiptilin\* OR tianeptin\* OR tranalcypropromin\* OR trazodon\* OR trimipramin\* OR venlafaxin\* OR viloxazin\*)

AND

#3 (("Drug AND Therapy AND Combination") OR (combin\*) OR (plus) OR (addition\*) OR (added\*) OR (augment\* ) OR (adjunct\*))

AND

#4 (random\* OR factorial\* OR crossover\* OR (cross over\*) OR (cross-over\*) OR placebo\* OR (doubl\* AND blind\*) OR (singl\* AND blind\*) OR assign\* OR allocat\* OR volunteer\*)

Search term for the systematic literature search as used in Pubmed:

#5 (#1) AND #4

#4 (#2) NOT #3

#3 (animals [mh] NOT humans [mh])

#2 ((randomized controlled trial [pt]) OR (controlled clinical trial [pt]) OR (randomized [tiab]) OR (placebo [tiab]) OR (clinical trials as topic [mesh: noexp]) OR (randomly [tiab]) OR (trial [ti]))

#1 (((("Drug Therapy, Combination"[Mesh]) OR (combin\* [tw]) OR (plus) OR (addition\* [tw]) OR (added\* [tw]) OR (augment\* [tw]) OR (adjunct\* [tw]))) AND

((("Antidepressive Agents"[Mesh]) OR (agomelatin\* OR amineptin\* OR amitriptylin\* OR amoxapin\* OR bupropion OR chlorimipramin\* OR citalopram OR clomipramin\* OR desipramin\* OR dibenzepin\* OR dosulepin\* OR dothiepin\* OR doxepin\* OR duloxetine\* OR escitalopram\* OR fluoxetine\* OR fluvoxamin\* OR imipramin\* OR isocarboxazid\* OR lofepramin\* OR maprotilin\* OR mianserin\* OR milnacipran\* OR mirtazapin\* OR moclobemid\* OR nefazodon\* OR nortriptylin\* OR paroxetine\* OR phenelzin\* OR protriptylin\* OR reboxetin\* OR sertraline\* OR setiptilin\* OR tianeptin\* OR tranylcypromin\* OR trazodon\* OR trimipramin\* OR venlafaxin\* OR viloxazin\*))

AND

((depress\*[tw]) OR (dysthymi\* [tw]) OR (Depressive Disorder\*) OR (Depression) OR ("Depression, Postpartum") OR ("Depressive Disorder, Major") OR ("Bipolar Disorder\*") OR ("Adjustment Disorder\*") OR ("Dysthymic Disorder\*") OR ("Seasonal Affective Disorder\*") OR ("Affective Disorders, Psychotic") OR ("Mood Disorder\*") OR ("Affective Symptoms") OR ("Affective Disorder") OR ("Depressive Disorder, treatment-resistant")))
